# Supplementary material for: A mitochondria-targeted red-emitting probe for imaging hydrogen sulfide in living cells and zebrafish
Source: Royal Society of Chemistry journal article supplement (doi:10.1039/c8ob03219j), 2019-01-01

# Supporting Information

## A mitochondria-targeted red-emitting probe for imaging of hydrogen sulfide in living cells and zebrafish

Ismail Ismail,<sup>†a</sup> Dan Wang,<sup>†a</sup> Dawei Wang,<sup>a</sup> Cuili Niu,<sup>a</sup> Haojie Huang,<sup>b</sup> Long Yi<sup>b,c</sup> and Zhen Xi<sup>a,c\*</sup>

<sup>a</sup>State Key Laboratory of Elemento-Organic Chemistry, and Department of Chemical Biology, National Pesticide Engineering Research Center, Collaborative Innovation Center of Chemical Science and Engineering, College of Chemistry, Nankai University, Tianjin 300071, P. R. China.

<sup>b</sup>State Key Laboratory of Organic-Inorganic Composites and Beijing Key Laboratory of Bioprocess, Beijing University of Chemical Technology (BUCT), Beijing 100029, China.

<sup>c</sup>Collaborative Innovation Center of Chemical Science and Engineering (Tianjin), Tianjin 300071, China.

<sup>†</sup>These authors contributed equally to this work.

\*corresponding author:

E-mail: zhenxi@nankai.edu.cn

Tel: +86 022-23504782, Fax: +86 022-23500952.

## Table of Contents

|                                 |      |
|---------------------------------|------|
| 1. Supporting Figures and Table | 2-5  |
| 2. Supporting spectra           | 6-11 |

## 1. Supporting Figures and Table

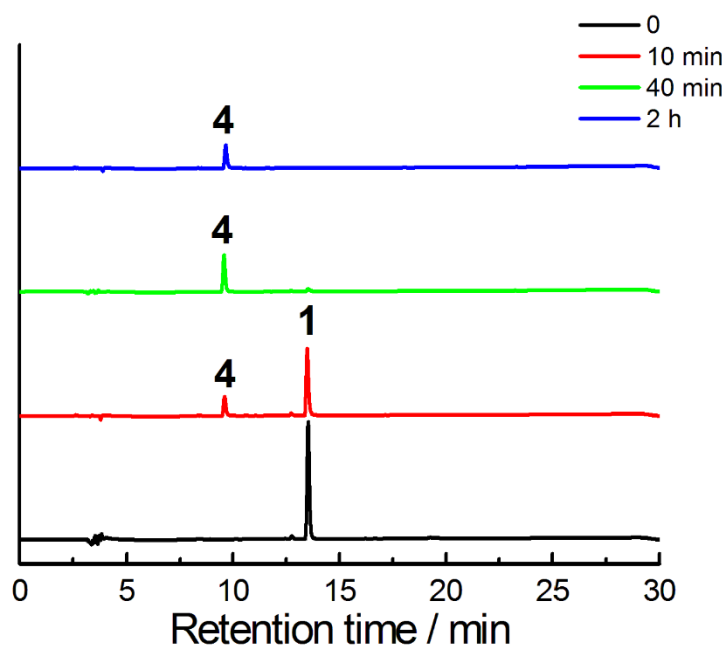

**Figure S1.** HPLC traces of the probe **1** (0.25 mM) and H<sub>2</sub>S (5 mM) at different reaction time (inset). Conditions: ANGELA TECHNOLOGIES HPLC LC-10F; C18 column with 4.6 mm x 250 mm; wavelength: 273 nm; flow 1.0 mL / min; buffer A: 0.1% (v / v) trifluoroacetic acid in water; buffer B: MeOH; elution condition: 0-3 min, B: 5-50%; 3-13 min, B: 50-80%; 13-25 min, B: 80-95%; 25-30 min, B: 95-5%; 30-32min, B: 5%.

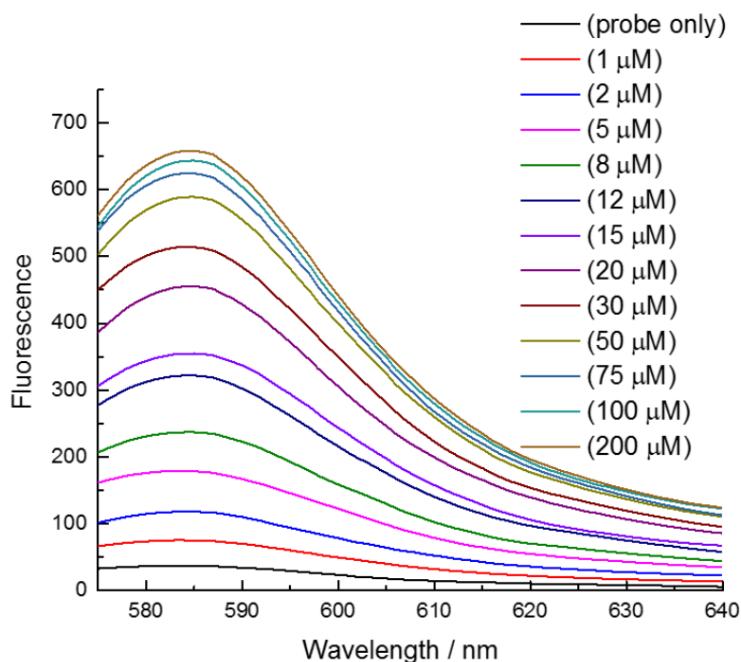

**Figure S2.** The titration of the probe **1** (5 μM) with variable concentrations of H<sub>2</sub>S (0-200 μM). The emission spectra were excited with 565 nm.

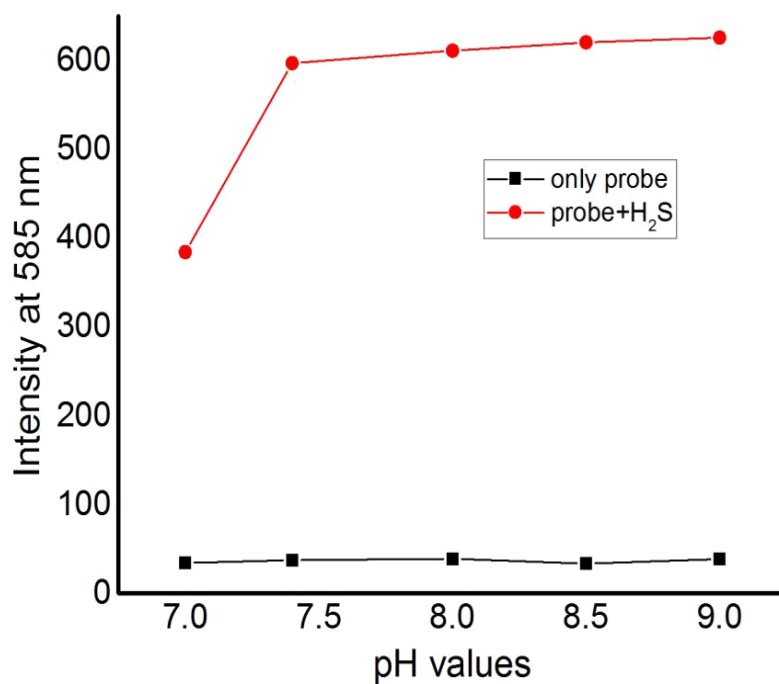

**Figure S3.** The emission intensity at 585 nm of **1** (5  $\mu$ M) at the indicated pH values in the absence or presence of H<sub>2</sub>S (100  $\mu$ M).

**Table S1.** The properties of several NBD-based H<sub>2</sub>S probes.

| Probe    | $\lambda_{ex}/\lambda_{em}$<br>(nm) | Fluor.<br>enhancement | $\phi$ | LOD/ $\mu$ M | Rate/ $k_2$                          | Ref       |
|----------|-------------------------------------|-----------------------|--------|--------------|--------------------------------------|-----------|
| <b>1</b> | 565/585                             | ~19                   | 0.77   | 0.36         | 27.8 M <sup>-1</sup> s <sup>-1</sup> | This work |
|          | 567/589                             | ~4.5                  | 0.36   | 0.58         | 113 M <sup>-1</sup> s <sup>-1</sup>  | 1         |
|          | 502/530                             | ~65                   | 0.64   | 0.057        | 28 M <sup>-1</sup> s <sup>-1</sup>   | 1         |
|          | 449/496                             | ~200                  | 0.81   | 0.9          | 7.6 M <sup>-1</sup> s <sup>-1</sup>  | 2         |

|                                                                                   |         |      |    |       |                                      |   |
|-----------------------------------------------------------------------------------|---------|------|----|-------|--------------------------------------|---|
| 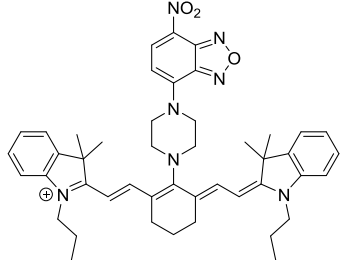 | 730/796 | ~87  | ND | 0.04  | 14.9 M <sup>-1</sup> s <sup>-1</sup> | 3 |
|  | 394/532 | ~68  | ND | 2.46  | 20.4 M <sup>-1</sup> s <sup>-1</sup> | 4 |
|  | 415/560 | ~273 | ND | 0.43  | 6.8 M <sup>-1</sup> s <sup>-1</sup>  | 5 |
|  | 330/468 | ~29  | ND | 0.024 | ND                                   | 6 |

ND, not determined.

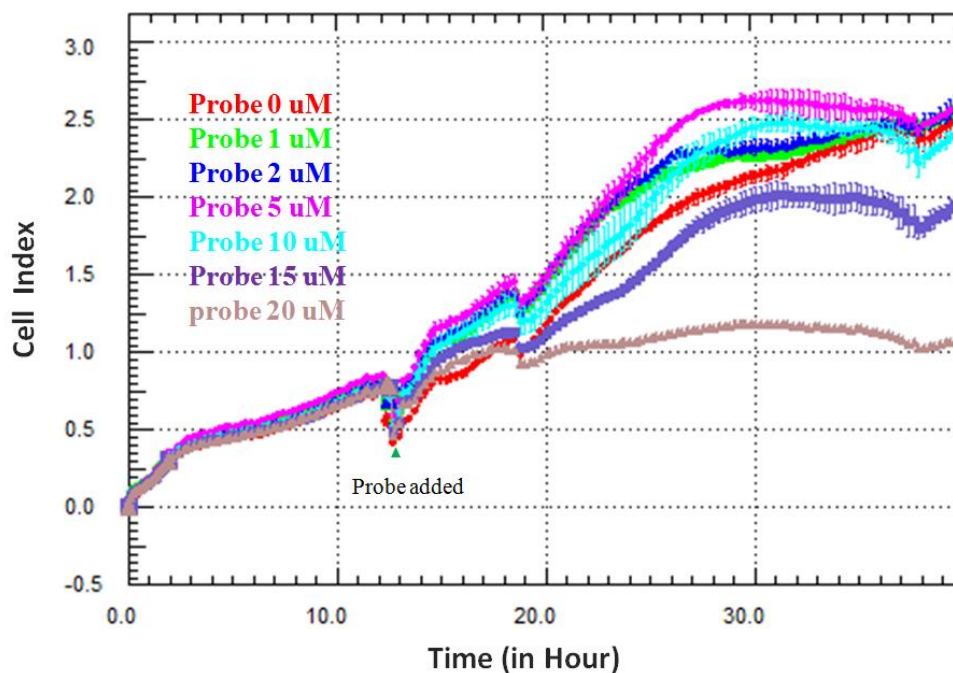

**Figure S4.** Evaluation on the cytotoxicity of the probe using xCELLigence RTCA system. Real-time monitoring of the density-dependent growth and proliferation of HEK293 cells with different probe concentration. The cell index values with time can reflect the adhesion number of cells inside the well.

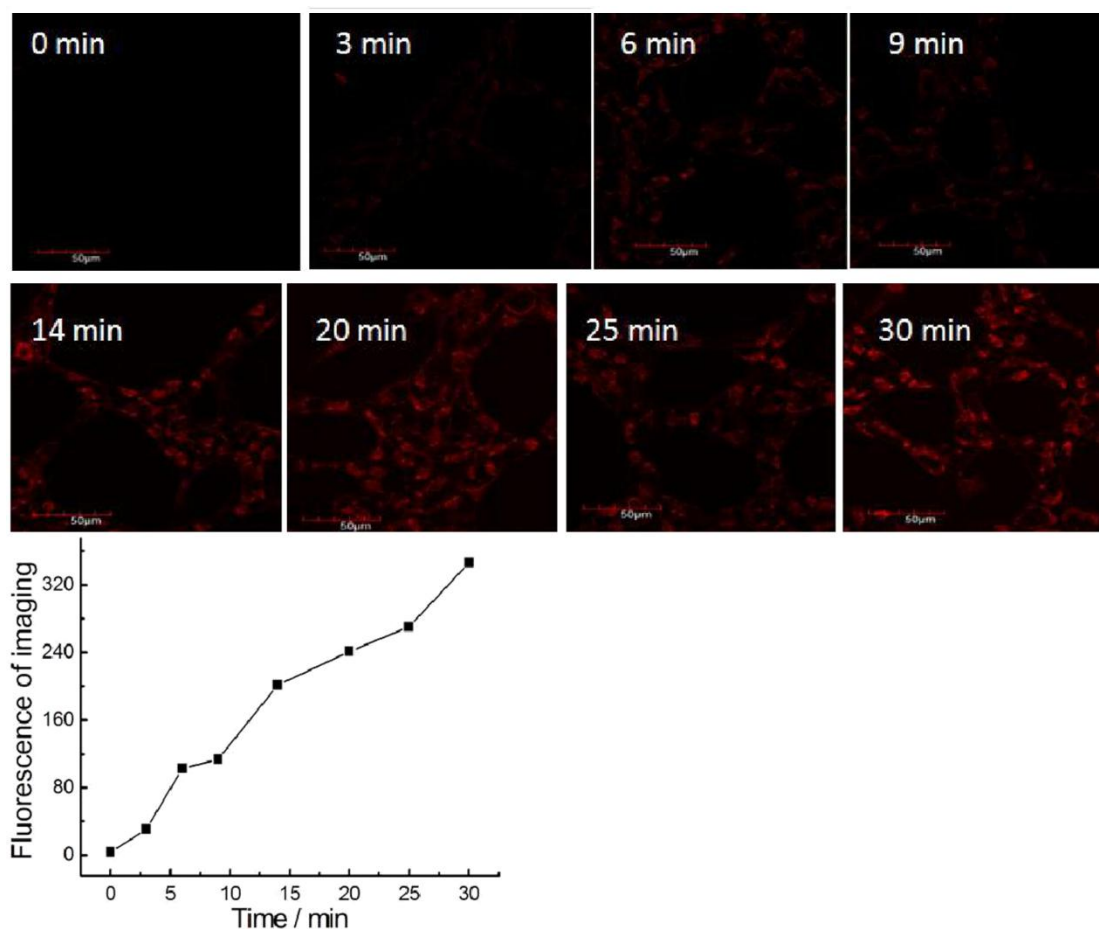

**Figure S5.** Fluorescence imaging for the L-Cys-induced  $H_2S$  in living cells. Cells were incubated with L-Cys ( $100 \mu M$ ) for 30 min, then washed cells and incubated with probe **1** ( $5 \mu M$ ) at different time intervals (0-30 min). The average fluorescence of the time-dependent images is shown below.

#### Supporting references:

- 1 R. Wang, Z. Li, C. Zhang, Y. Li, G. Xu, Q. Z. Zhang, L. Y. Li, L. Yi and Z. Xi, *ChemBioChem.*, 2016, 17, 968.
- 2 I. Ismail, D. Wang, D. Wang, Z. Wang, C. Zhang, L. Yi and Z. Xi, *Dyes Pigments*, 2019, 163, 706.
- 3 K. Zhang, J. Zhang, Z. Xi, L. Y. Li, X. X. Gu, Q. Z. Zhang and L. Yi, *Chem Sci.*, 2017, 8, 2781.
- 4 Y. L. Pak, J. Li, K. C. Ko, G. Kim, J. Y. Lee and J. Yoon, *Anal Chem.*, 2016, 88, 5481.
- 5 J. Zhang, R. Y. Wang, Z. T. Zhu, L. Yi and Z. Xi, *Tetrahedron.*, 2015, 71, 8576.
- 6 Y. Tang and G. F. Jiang, *New J Chem.*, 2017, 41, 6774.

## 2. Supporting spectra

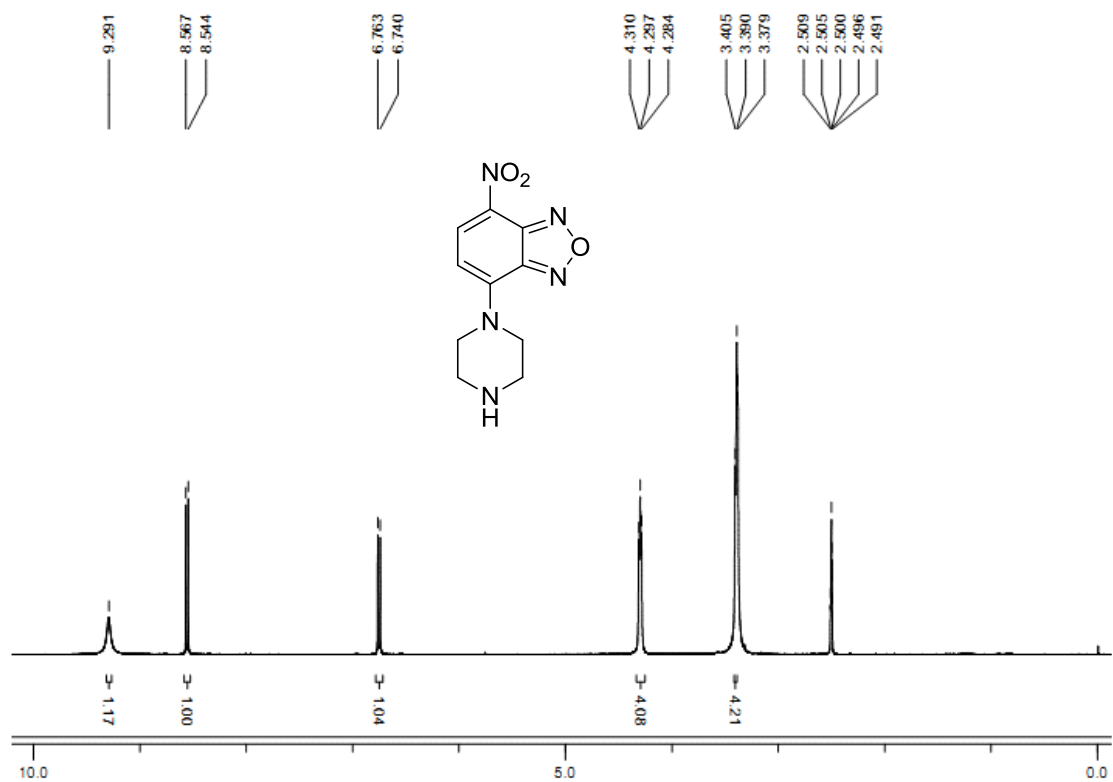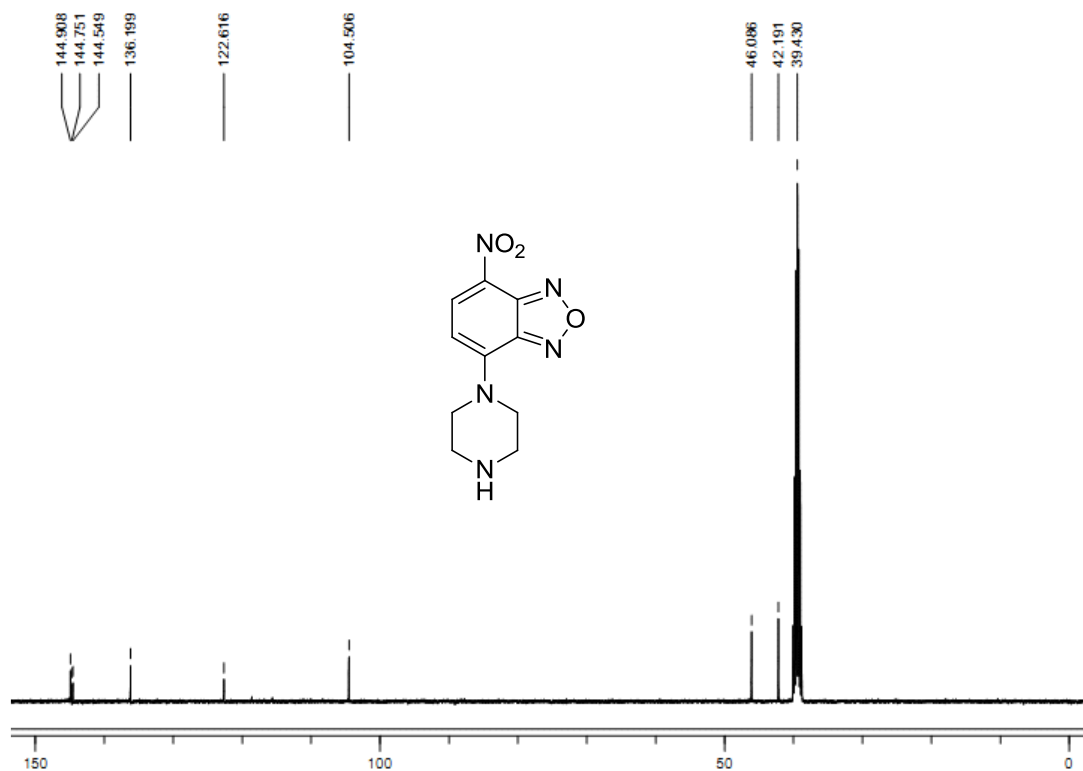

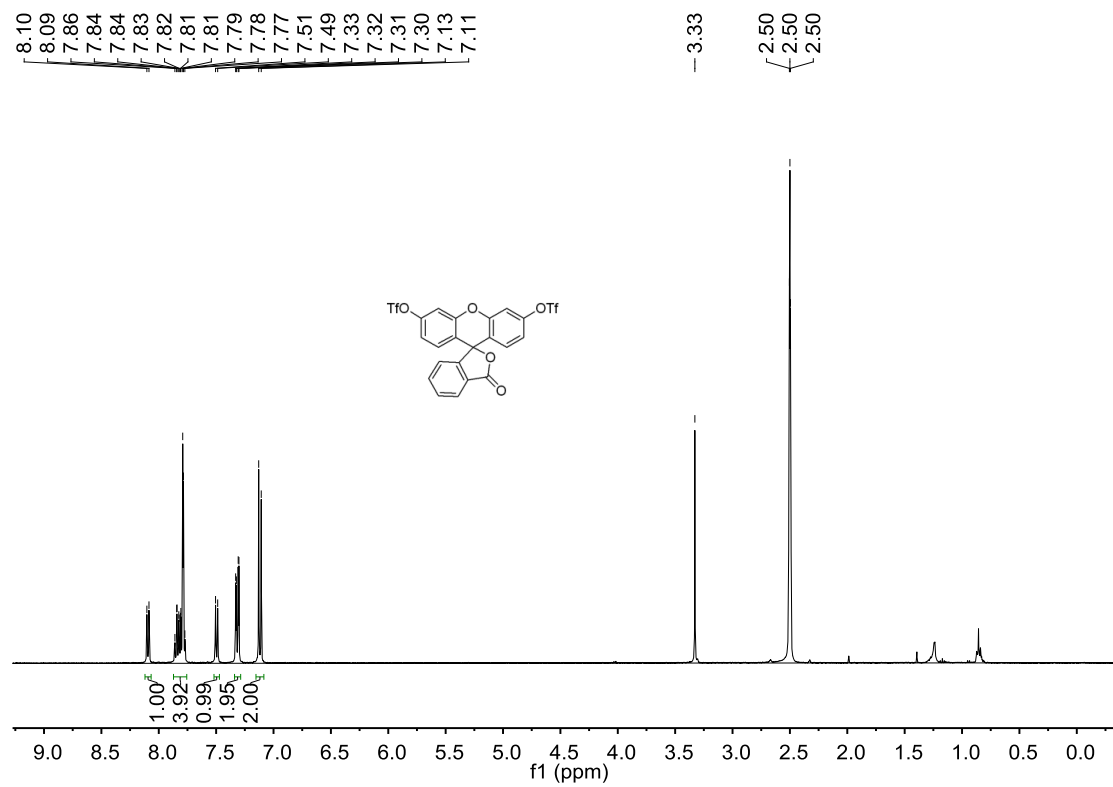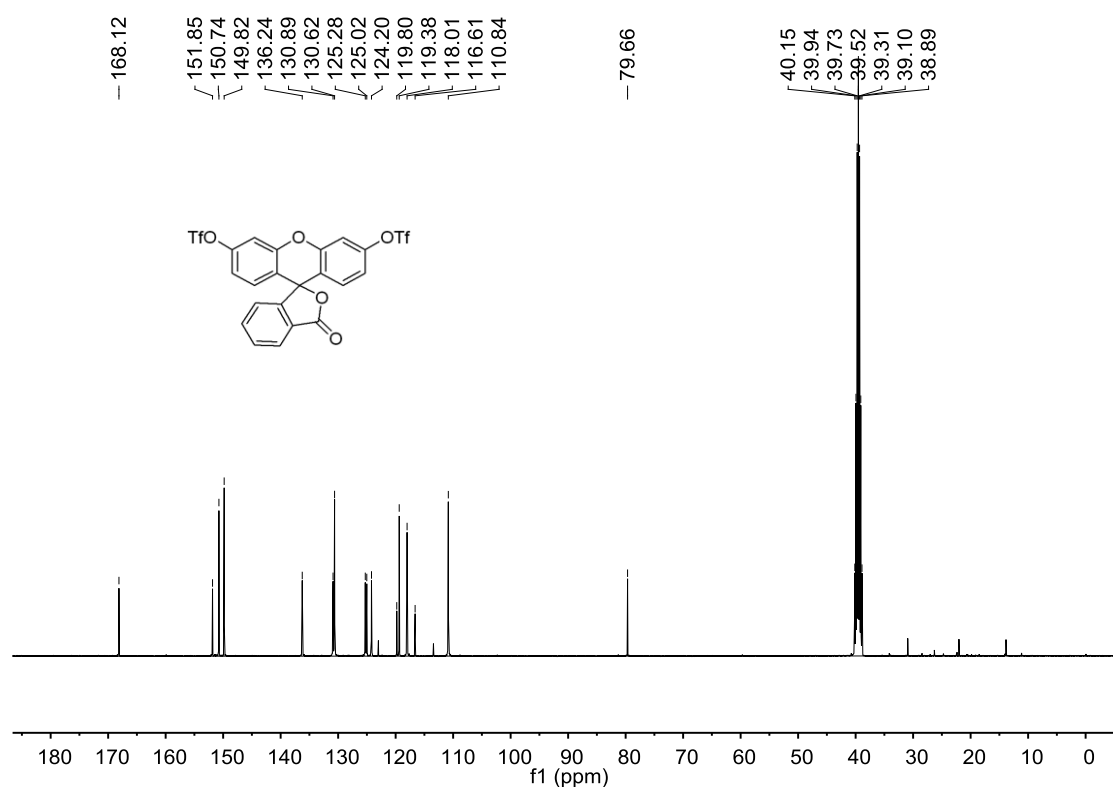

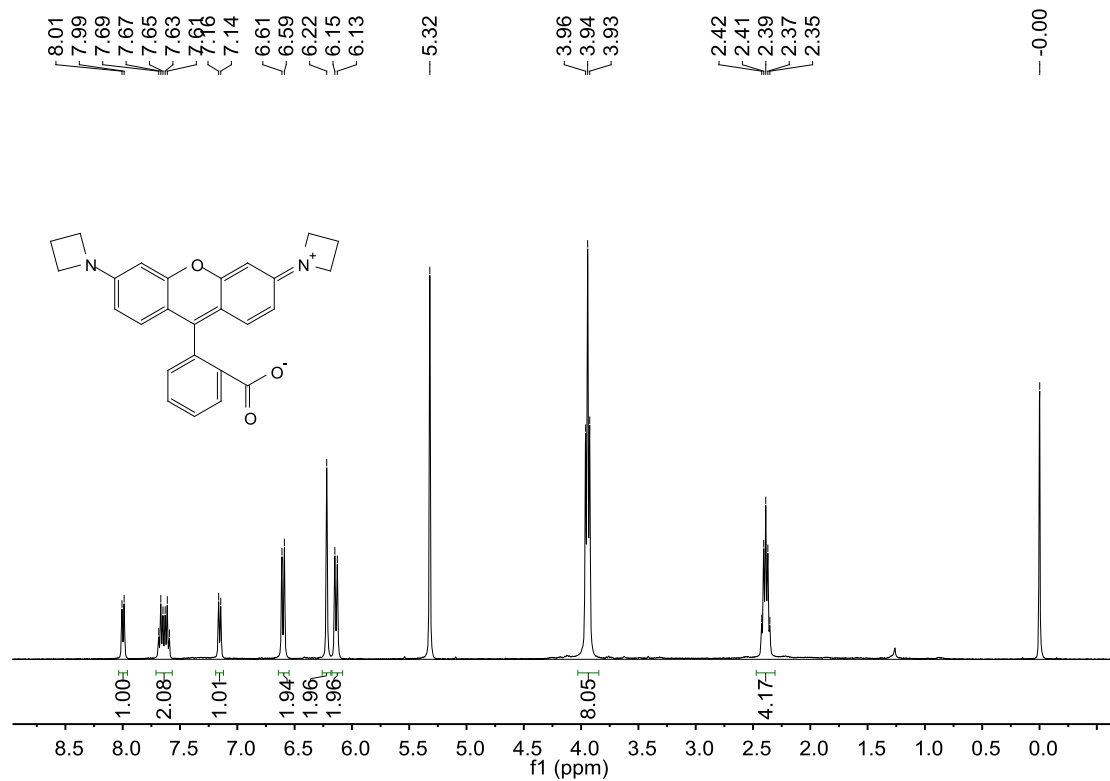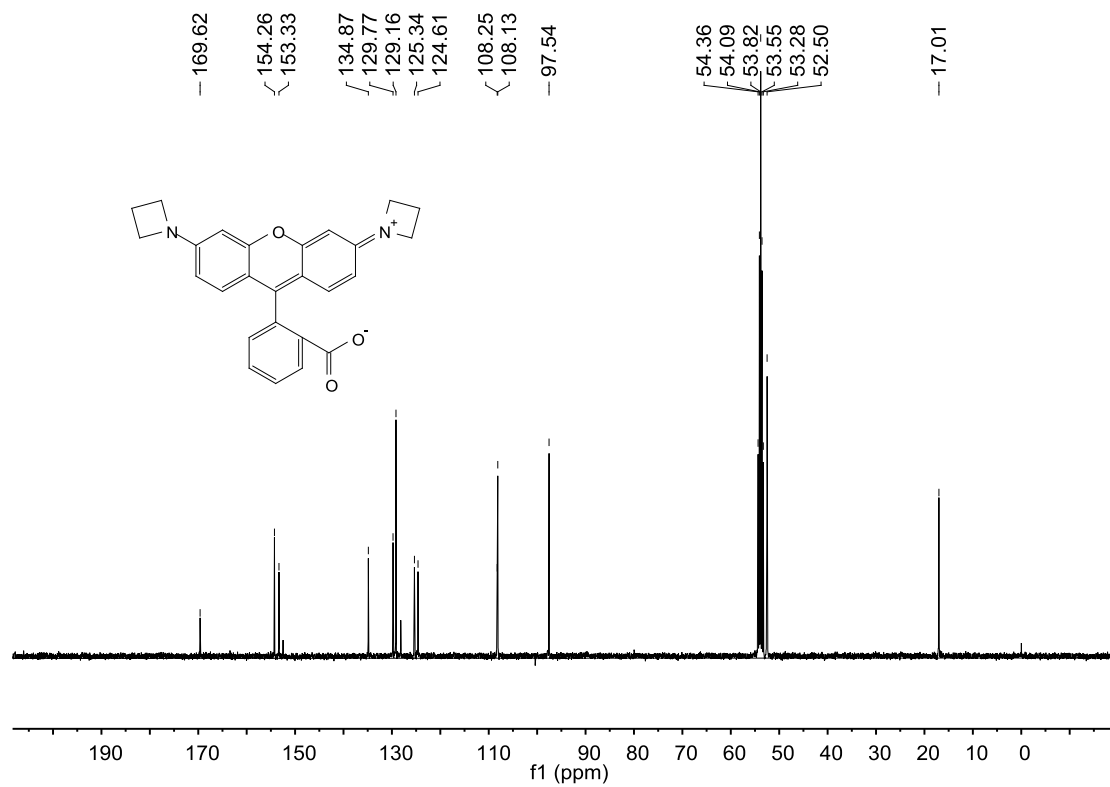





Varian QFT-ESI  
File: ismail349\_ESI.trans

Mode: Positive  
Scans: 1

Date: 29-NOV-2018  
Time: 16:12:06  
Scale: 49.4503

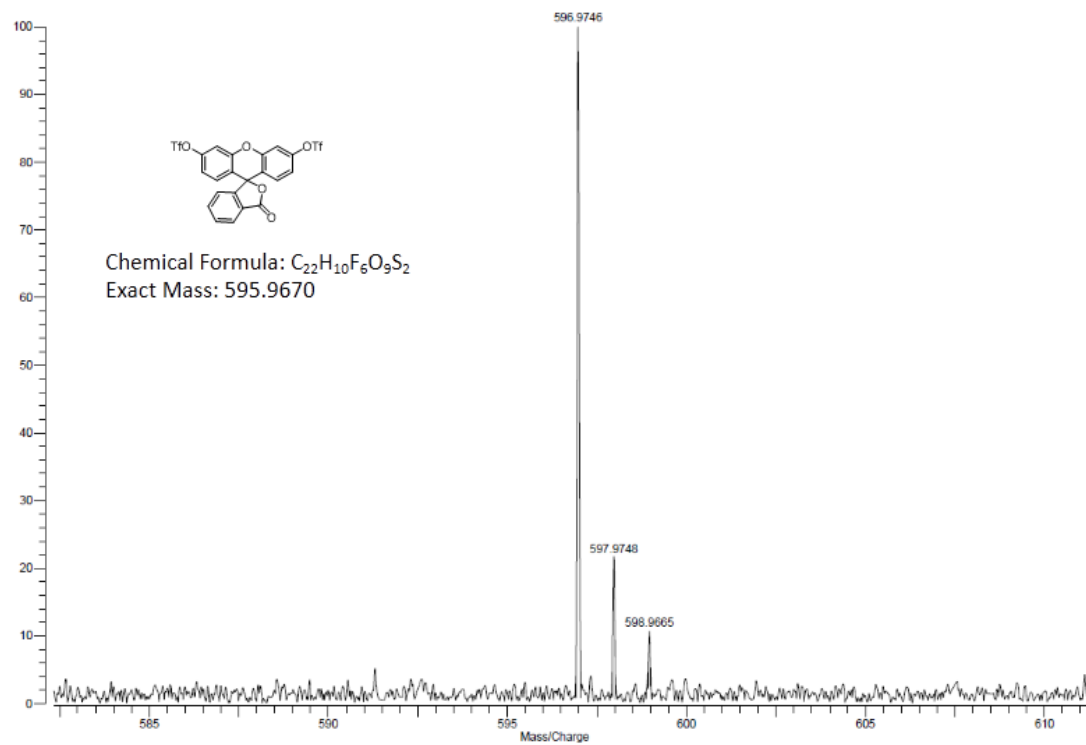

Varian QFT-ESI  
File: ismail356\_ESI.trans

Mode: Positive  
Scans: 1

Date: 30-NOV-2018  
Time: 15:23:18  
Scale: 14.6239

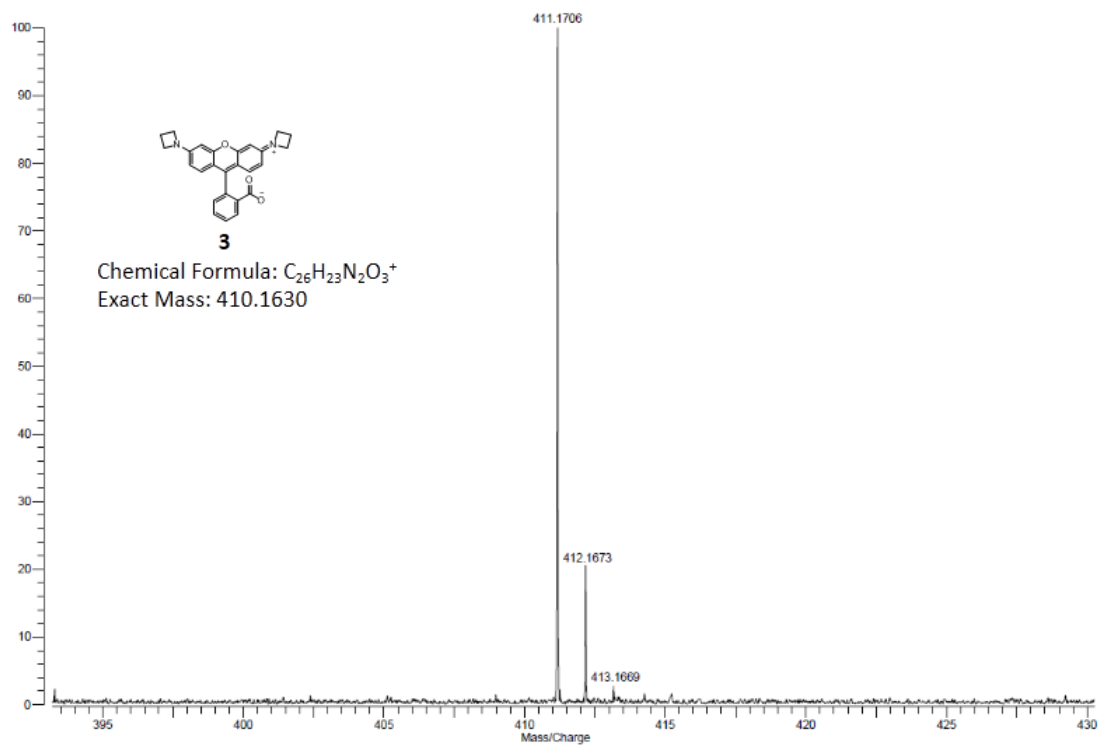

Varian QFT-ESI  
File: ismail-20181129-1\_ESI.trans

Mode: Positive  
Scans: 1

Date: 29-NOV-2018  
Time: 16:02:48  
Scale: 33.9985

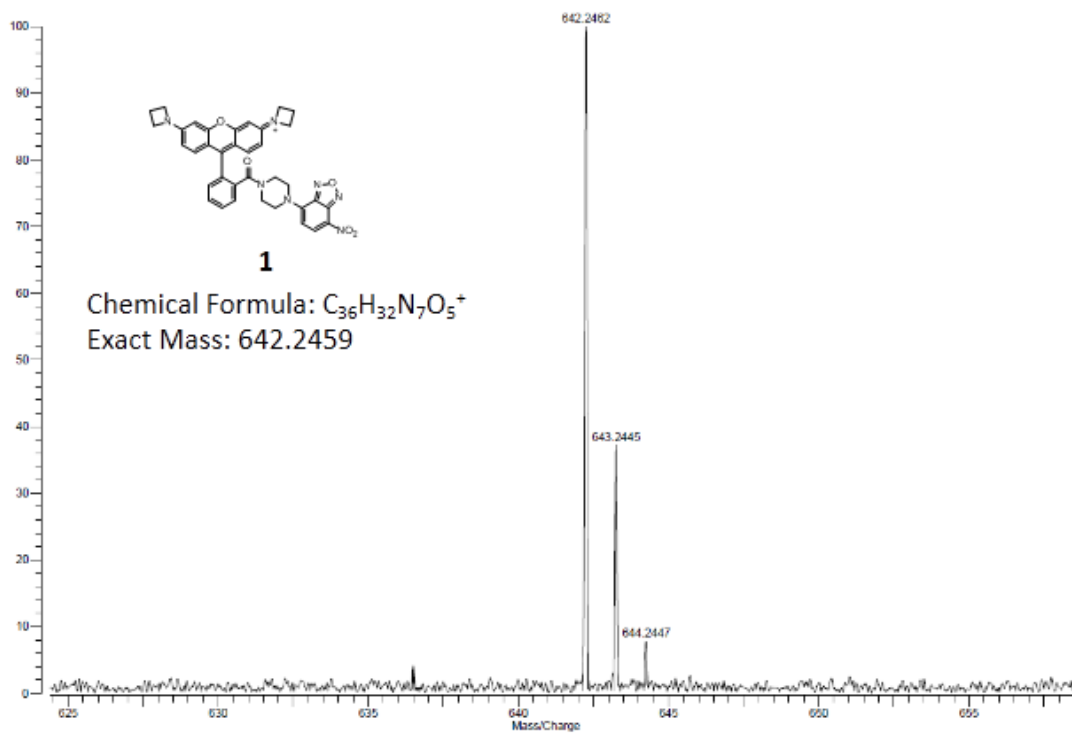

Varian QFT-ESI  
File: ismail20181129-2\_ESI.trans

Mode: Positive  
Scans: 1

Date: 29-NOV-2018  
Time: 16:15:42  
Scale: 48.4814

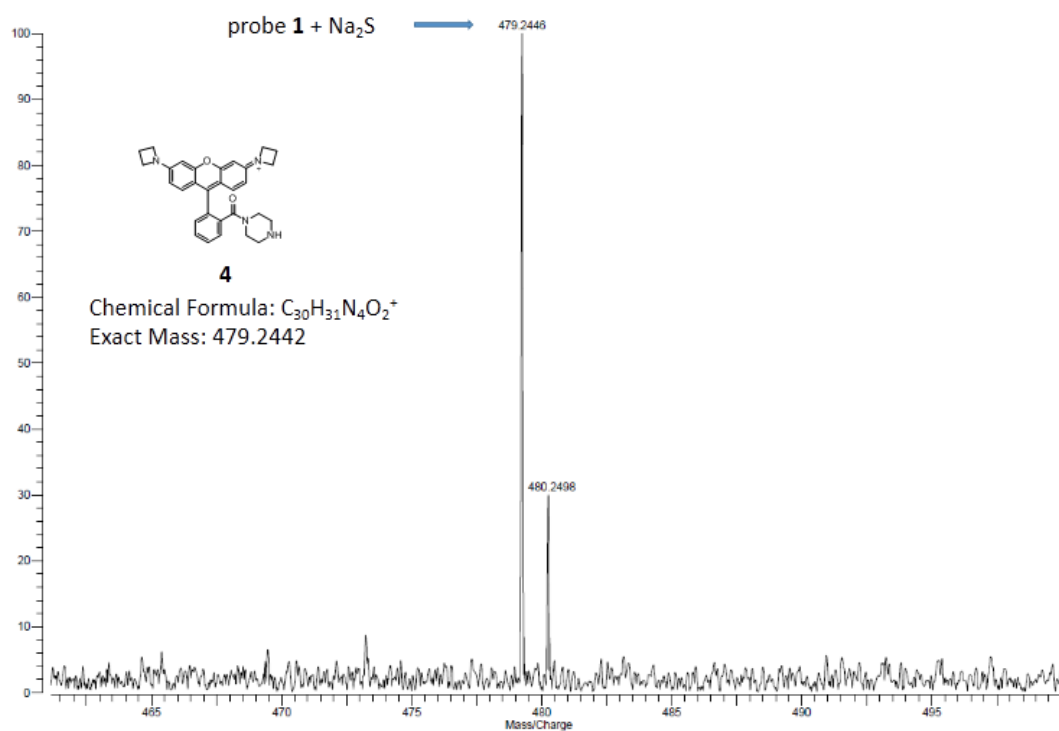

Supplement: c8ob03219j1.pdf [file c8ob03219j1.pdf]
